# Supplementary material
Source: HighWire-hosted journal article supplement (https://jnm.snmjournals.org/highwire/filestream/94503/field_highwire_adjunct_files/0/132647_Supplemental_Data.pdf)
Supplement: 132647_Supplemental_Data.pdf [file 132647_Supplemental_Data.pdf]

**SUPPLEMENTAL TABLE 1**

Mean (SD) unadjusted and glucose-adjusted FDG meta-ROI ratio by type 2 diabetes

| Region                            | Type 2 diabetes | No diabetes     | p       | Type 2 diabetes | No diabetes   | p    |
|-----------------------------------|-----------------|-----------------|---------|-----------------|---------------|------|
|                                   | n = 154         | n = 595         |         | n = 154         | n = 595       |      |
|                                   | Unadjusted mean | Unadjusted mean |         | Adjusted mean   | Adjusted mean |      |
| AD signature FDG <sup>a</sup>     | 1.34 (0.17)     | 1.39 (0.15)     | 0.0001  | 1.37 (0.01)     | 1.38 (0.01)   | 0.33 |
| Posterior cingulate               | 1.66 (0.19)     | 1.72 (0.18)     | <0.0001 | 1.70 (0.02)     | 1.71 (0.01)   | 0.73 |
| Temporal gyrus                    | 1.11 (0.18)     | 1.14 (0.17)     | 0.0497  | 1.13 (0.02)     | 1.13 (0.01)   | 0.87 |
| Angular gyrus                     | 1.41 (0.20)     | 1.48 (0.18)     | <0.0001 | 1.44 (0.02)     | 1.47 (0.01)   | 0.08 |
| Primary sensorimotor <sup>b</sup> | 1.40 (0.13)     | 1.43 (0.11)     | 0.002   | 1.42 (0.01)     | 1.42 (0.005)  | 0.72 |
| Precentral gyrus                  | 1.42 (0.13)     | 1.44 (0.11)     | 0.004   | 1.44 (0.01)     | 1.43 (0.005)  | 0.38 |
| Paracentral gyrus                 | 1.48 (0.16)     | 1.49 (0.14)     | 0.30    | 1.51 (0.01)     | 1.48 (0.01)   | 0.08 |
| Postcentral gyrus                 | 1.36 (0.14)     | 1.39 (0.12)     | 0.0005  | 1.38 (0.01)     | 1.39 (0.005)  | 0.65 |
| Whole brain                       | 1.39 (0.11)     | 1.43 (0.10)     | <0.0001 | 1.41 (0.01)     | 1.42 (0.004)  | 0.52 |

Estimates are unadjusted means (standard deviations) and linear regression glucose-adjusted means (standard error of the mean).  
<sup>a</sup>AD signature FDG meta-ROI ratio was assessed over voxels in the bilateral angular gyri, posterior cingulate/precuneus, and inferior temporal regions of interest.  
<sup>b</sup>Comparison group consisting of a composite measure for uptake over voxels in the precentral, paracentral, and postcentral primary sensorimotor cortices.

**SUPPLEMENTAL TABLE 2**

Associations of type 2 diabetes with global whole brain and sensorimotor cortex FDG-PET ratio

|                            | Beta estimate (SE): column headings represent covariates included in each model |               |               |               |                         |
|----------------------------|---------------------------------------------------------------------------------|---------------|---------------|---------------|-------------------------|
|                            | Age and Sex                                                                     | Education     | APOE ε4       | Glucose       | Full model <sup>a</sup> |
| <b>Whole brain</b>         |                                                                                 |               |               |               |                         |
| <b>Total sample</b>        |                                                                                 |               |               |               |                         |
| Beta (standard error)      | -0.034 (0.01)                                                                   | -0.034 (0.01) | -0.034 (0.01) | -0.004 (0.01) | -0.005 (0.01)           |
| P value                    | 0.0001                                                                          | 0.0001        | 0.0001        | 0.65          | 0.58                    |
| <b>Cognitively normal</b>  |                                                                                 |               |               |               |                         |
| Beta (standard error)      | -0.031 (0.01)                                                                   | -0.031 (0.01) | -0.031 (0.01) | 0.005 (0.01)  | 0.005 (0.01)            |
| P value                    | 0.002                                                                           | 0.002         | 0.002         | 0.66          | 0.66                    |
| <b>MCI</b>                 |                                                                                 |               |               |               |                         |
| Beta (standard error)      | -0.036 (0.02)                                                                   | -0.038 (0.02) | -0.039 (0.02) | -0.022 (0.02) | -0.028 (0.02)           |
| P value                    | 0.06                                                                            | 0.04          | 0.045         | 0.27          | 0.17                    |
| <b>Sensorimotor cortex</b> |                                                                                 |               |               |               |                         |
| <b>Total sample</b>        |                                                                                 |               |               |               |                         |
| Beta (standard error)      | -0.027 (0.01)                                                                   | -0.027 (0.01) | -0.027 (0.01) | 0.005 (0.01)  | 0.005 (0.01)            |
| P value                    | 0.008                                                                           | 0.007         | 0.008         | 0.64          | 0.64                    |
| <b>Cognitively normal</b>  |                                                                                 |               |               |               |                         |
| Beta (standard error)      | -0.027 (0.01)                                                                   | -0.027 (0.01) | -0.027 (0.01) | 0.012 (0.01)  | 0.011 (0.01)            |
| P value                    | 0.02                                                                            | 0.02          | 0.02          | 0.35          | 0.35                    |
| <b>MCI</b>                 |                                                                                 |               |               |               |                         |
| Beta (standard error)      | -0.028 (0.02)                                                                   | -0.029 (0.02) | -0.026 (0.02) | -0.013 (0.02) | -0.012 (0.02)           |
| P value                    | 0.20                                                                            | 0.19          | 0.24          | 0.56          | 0.63                    |

SE, standard error; FDG, <sup>18</sup>F fluorodeoxyglucose; PET, positron emission tomography.

<sup>a</sup>All models include adjustment for age and sex; each column shows the variable added separately, to a model with age and sex. The full model is adjusted for age, sex, education, APOE ε4 allele, and glucose level.

**SUPPLEMENTAL TABLE 3**

Associations of type 2 diabetes with AD signature FDG-PET meta-ROI ratio across strata of key covariates

| Characteristic                    | Stratification Variable |              |              |              |              |              |               |              |
|-----------------------------------|-------------------------|--------------|--------------|--------------|--------------|--------------|---------------|--------------|
|                                   | Age                     |              | APOE ε4      |              | Sex          |              | Blood glucose |              |
|                                   | 70 - 79                 | 80+          | ε4 negative  | ε4 positive  | Men          | Women        | < 126 mg/dl   | ≥ 126 mg/dl  |
| Diabetes/no diabetes <sup>a</sup> | 74/336                  | 80/259       | 114/434      | 40/160       | 96/327       | 58/268       | 105/576       | 49/19        |
| AD signature FDG meta-ROI ratio   |                         |              |              |              |              |              |               |              |
| Odds ratio                        | 3.02                    | 1.60         | 2.62         | 1.47         | 2.42         | 1.96         | 1.72          | 2.03         |
| (95% CI) <sup>b</sup>             | (1.75, 5.20)            | (0.97, 2.65) | (1.68, 4.09) | (0.71, 3.05) | (1.50, 3.90) | (1.05, 3.65) | (1.11, 2.69)  | (0.63, 6.60) |
| P value                           | <0.001                  | 0.07         | <0.001       | 0.30         | 0.0003       | 0.03         | 0.02          | 0.24         |
| P value for interaction           | 0.08                    |              | 0.18         |              | 0.57         |              | 0.79          |              |

Abbreviations: AD = Alzheimer's disease.

<sup>a</sup>Number with vs. without diabetes in each strata; based on total sample.

<sup>b</sup>95% confidence interval. Models include age, sex, and education where applicable.
